# Supplementary material
Source: Royal Society of Chemistry journal article supplement (doi:10.1039/d6fo01112h)
Supplement: d6fo01112h1.pdf [file d6fo01112h1.pdf]

**Table S1. Quality and Safety parameters of PO<sup>a</sup>**

| Parameter              | Result          | Limit         |
|------------------------|-----------------|---------------|
| Acid value (mg/g)      | 0.38 ± 0.03     | ≤ 5.0         |
| Iodine value (g/100g)  | 184.4 ± 2.2     | 160-209       |
| Benzo[a]pyrene (µg/kg) | Not detected    | ≤ 2.0         |
| Escherichia coli       | Negative        | Not specified |
| Lead (Pb, mg/kg)       | 0.0037 ± 0.0005 | ≤ 0.1         |
| Arsenic (As, mg/kg)    | 0.0005 ± 0.0001 | ≤ 0.1         |
| Cadmium (Cd, mg/kg)    | 0.0002 ± 0.0001 | Not specified |
| Mercury (Hg, mg/kg)    | 0.0016 ± 0.0006 | Not specified |

<sup>a</sup> Mean ± SE (all such values). PO, Perilla oil.

**Table S2. Primer sequences list for qRT-PCR<sup>a</sup>**

| <b>Gene</b>    |         | <b>Primer sequence (5'-3')</b> |
|----------------|---------|--------------------------------|
| IL-6           | forward | GTAGTGAGGAACAAGCCAGAG          |
|                | reverse | GGACTGCAGGAACTCCTTAAA          |
| TNF- $\alpha$  | forward | AGCCCATGTTGTAGCAAACC           |
|                | reverse | TCTCAGCTCCACGCCATT             |
| IFN- $\gamma$  | forward | GTGGAGACCATCAAGGAAGAC          |
|                | reverse | CAGGCAGGACAACCATTACT           |
| TBX21          | forward | GCCAAAGGATTCCGGGAGAA           |
|                | reverse | CCTGGGGAACACATCCTTC            |
| GATA3          | forward | CTTTGCTGCCTCCAAGAACAC          |
|                | reverse | GCGAGTGTCTTCTCATGGT            |
| GATA3          | forward | GTCCTGTGCGAACTGTCAGA           |
|                | reverse | CGAGCTGTTCTTGGGGAAGT           |
| IL-10          | forward | ACACATCAGGGGCTTGCTC            |
|                | reverse | GTGGTCAGGCTTGAATGGA            |
| FOXP3          | forward | CCCCTTACAGGCACTCCTC            |
|                | reverse | GGGATTTGGGAAGGTGCAGA           |
| $\beta$ -actin | forward | GCCTCGCCTTTGCCGAT              |
|                | reverse | GCCTCGCCTTTGCCGAT              |

<sup>a</sup> IL; interleukin, TNF; tumor necrosis factor- $\alpha$ , IFN; interferon; TBX21, T-box transcription factor 21; GATA3. gata binding protein 3; FOX, forkheadbox.

**Table S3. Compliance<sup>a</sup>**

(unit: %)

|        | <b>Placebo (N=33)</b> | <b>PO (N=32)</b> | <b>P-value<sup>b</sup></b> |
|--------|-----------------------|------------------|----------------------------|
| Week 4 | 99.7 ± 0.7            | 101.1 ± 1.9      | 0.502                      |
| Week 8 | 99.7 ± 0.2            | 98.8 ± 0.6       | 0.190                      |
| Total  | 99.7 ± 0.4            | 100.0 ± 1.1      | 0.807                      |

<sup>a</sup> Mean ± SE (all such values). PO, Perilla oil.<sup>b</sup> Two-sample t-test was used to compare the difference between the groups.

**Table S4. Alcohol intake, smoking amount, dietary intake, MEDFICTS and physical activity<sup>a</sup>**

| <b>Variables</b>             | <b>Placebo (N=33)</b> | <b>PO (N=32)</b> | <b>P-value<sup>b</sup></b> |
|------------------------------|-----------------------|------------------|----------------------------|
| Alcohol intake (SD/wk)       |                       |                  |                            |
| Week 0                       | 2.2 ± 0.8             | 4.4 ± 0.9        |                            |
| Week 4                       | 3.7 ± 1.0             | 6.6 ± 1.4        |                            |
| Week 8                       | 6.3 ± 1.6             | 5.0 ± 1.0        | 0.026                      |
| <i>P</i> -value <sup>c</sup> | <0.001                | 0.599            |                            |
| Smoking amount (cigarette/d) |                       |                  |                            |
| Week 0                       | 11.5 ± 1.0            | 11.6 ± 1.0       |                            |
| Week 4                       | 10.6 ± 1.0            | 11.8 ± 1.0       |                            |
| Week 8                       | 10.9 ± 0.9            | 11.9 ± 1.0       | 0.593                      |
| <i>P</i> -value <sup>c</sup> | 0.544                 | 0.263            |                            |
| Dietary intake               |                       |                  |                            |
| Energy (Kcal/d)              |                       |                  |                            |
| Week 0                       | 1541.3 ± 57.3         | 1642.5 ± 57.5    |                            |
| Week 4                       | 1565.0 ± 55.9         | 1725.1 ± 51.5    |                            |
| Week 8                       | 1585.1 ± 52.6         | 1723.4 ± 54.8    | 0.586                      |
| <i>P</i> -value <sup>c</sup> | 0.198                 | 0.045            |                            |
| Carbohydrate (g/d)           |                       |                  |                            |
| Week 0                       | 217.3 ± 10.1          | 232.9 ± 9.4      |                            |
| Week 4                       | 217.8 ± 10.0          | 239.4 ± 7.3      |                            |
| Week 8                       | 225.3 ± 9.2           | 237.3 ± 8.7      | 0.621                      |
| <i>P</i> -value <sup>c</sup> | 0.252                 | 0.538            |                            |
| Protein (g/d)                |                       |                  |                            |
| Week 0                       | 59.1 ± 2.6            | 61.4 ± 3.4       |                            |
| Week 4                       | 62.0 ± 2.4            | 68.3 ± 3.3       |                            |
| Week 8                       | 60.9 ± 2.3            | 67.7 ± 2.5       | 0.345                      |
| <i>P</i> -value <sup>c</sup> | 0.388                 | 0.006            |                            |
| Fat (g/d)                    |                       |                  |                            |
| Week 0                       | 48.8 ± 2.2            | 50.3 ± 2.7       |                            |
| Week 4                       | 50.1 ± 2.4            | 51.0 ± 2.7       |                            |
| Week 8                       | 49.3 ± 2.9            | 54.8 ± 2.9       | 0.366                      |
| <i>P</i> -value <sup>c</sup> | 1.000                 | 0.103            |                            |

**Table S4. Alcohol intake, smoking amount, dietary intake, MEDFICTS and physical activity<sup>a</sup> (continued)**

| <b>Variables</b>               | <b>Placebo (N=33)</b> | <b>PO (N=32)</b> | <b>P-value<sup>b</sup></b> |
|--------------------------------|-----------------------|------------------|----------------------------|
| Sodium (mg/d)                  |                       |                  |                            |
| Week 0                         | 3576.2 ± 247.8        | 3324.8 ± 255.9   |                            |
| Week 4                         | 3484.1 ± 218.6        | 3481.6 ± 221.6   |                            |
| Week 8                         | 3695.1 ± 198.4        | 3464.7 ± 149.0   | 0.483                      |
| P-value <sup>c</sup>           | 0.364                 | 0.057            |                            |
| MEDFICTS                       |                       |                  |                            |
| Week 0                         | 32.5 ± 3.0            | 31.7 ± 2.5       |                            |
| Week 4                         | 28.1 ± 2.7            | 29.9 ± 2.9       |                            |
| Week 8                         | 32.2 ± 2.9            | 28.3 ± 2.2       | 0.312                      |
| P-value <sup>c</sup>           | 0.971                 | 0.211            |                            |
| Physical activity (MET-min/wk) |                       |                  |                            |
| Week 0                         | 4026.1 ± 758.7        | 3033.1 ± 608.5   |                            |
| Week 4                         | 2605.5 ± 385.9        | 2948.9 ± 569.9   |                            |
| Week 8                         | 3126.7 ± 485.5        | 3329.3 ± 675.7   | 0.189                      |
| P-value <sup>c</sup>           | 0.115                 | 0.630            |                            |

<sup>a</sup> Mean ± SE (all such values). PO, Perilla oil; SD, standard drink; MEDFICTS, Meats, eggs, dairy, fried foods, fat in baked goods, convenience foods, fats added at the table, snacks; MET, metabolic equivalent task.

<sup>b</sup> Linear mixed-effect model was used to analyze the effects of group\*week.

<sup>c</sup> Linear mixed-effect model was used to analyze the difference within each group.

**Table S5. Platelet aggregation<sup>a</sup>**

| <b>Variables</b>             | <b><i>N</i></b> | <b>Placebo</b> | <b><i>N</i></b> | <b>PO</b>   | <b>Estimate<sup>b</sup></b> | <b><i>P</i>-value<sup>b</sup></b> | <b><i>P</i>-value<sup>c</sup></b> |
|------------------------------|-----------------|----------------|-----------------|-------------|-----------------------------|-----------------------------------|-----------------------------------|
| C-ADP CT (sec)               |                 |                |                 |             |                             |                                   |                                   |
| Week 0                       | 32              | 94.0 ± 3.1     | 30              | 94.5 ± 3.6  |                             |                                   |                                   |
| Week 8                       | 32              | 96.1 ± 3.2     | 32              | 106.2 ± 3.9 | 8.6                         | 0.045                             | 0.067                             |
| <i>P</i> -value <sup>d</sup> |                 | 0.661          |                 | 0.001       |                             |                                   | □                                 |
| C-EPI CT (sec)               |                 |                |                 |             |                             |                                   |                                   |
| Week 0                       | 31              | 130.5 ± 5.6    | 32              | 134.8 ± 6.7 |                             |                                   |                                   |
| Week 8                       | 30              | 137.7 ± 5.3    | 31              | 151.1 ± 8.5 | 11.9                        | 0.186                             | 0.225                             |
| <i>P</i> -value <sup>d</sup> |                 | 0.474          |                 | 0.008       |                             |                                   | □                                 |

<sup>a</sup> Mean ± SE (all such values). PO, Perilla oil; C-ADP CT, Collagen-ADP closure time; C-EPI CT, Collagen-epinephrine closure time. Number of participants used for analysis after outlier removal based on available data.

<sup>b</sup> Linear mixed-effect model adjusted with alcohol intake for 8 weeks was used to compare the changes for 8 weeks between the groups.

<sup>c</sup> Linear mixed-effect model was used to compare the changes for 8 weeks between the groups.

<sup>d</sup> Linear mixed-effect model adjusted with alcohol intake for 8 weeks was used to compare the changes for 8 weeks within each group.

**Table S6. Blood coagulation and fibrinolysis<sup>a</sup>**

| Variables                    | <i>N</i> | Placebo        | <i>N</i> | PO           | Estimate <sup>b</sup> | <i>P</i> -value <sup>b</sup> | <i>P</i> -value <sup>c</sup> |
|------------------------------|----------|----------------|----------|--------------|-----------------------|------------------------------|------------------------------|
| Blood coagulation            |          |                |          |              |                       |                              |                              |
| PT (sec)                     |          |                |          |              |                       |                              |                              |
| Week 0                       | 32       | 11.09 ± 0.08   | 31       | 11.06 ± 0.08 |                       |                              |                              |
| Week 8                       | 32       | 11.18 ± 0.08   | 32       | 11.18 ± 0.08 | 0.04                  | 0.739                        | 0.630                        |
| <i>P</i> -value <sup>d</sup> |          | 0.208          |          | 0.077        |                       |                              | □                            |
| aPTT (sec)                   |          |                |          |              |                       |                              |                              |
| Week 0                       | 30       | 26.69 ± 0.26   | 32       | 26.99 ± 0.25 |                       |                              |                              |
| Week 8                       | 33       | 27.42 ± 0.34   | 32       | 27.42 ± 0.28 | -0.30                 | 0.249                        | 0.343                        |
| <i>P</i> -value <sup>d</sup> |          | < 0.001        |          | 0.012        |                       |                              | □                            |
| Fibrinolysis                 |          |                |          |              |                       |                              |                              |
| Fibrinogen (mg/dL)           |          |                |          |              |                       |                              |                              |
| Week 0                       | 33       | 234.1 ± 8.0    | 31       | 237.2 ± 8.4  |                       |                              |                              |
| Week 8                       | 31       | 220.7 ± 8.2    | 32       | 231.0 ± 6.9  | 0.2                   | 0.818                        | 0.686                        |
| <i>P</i> -value <sup>d</sup> |          | 0.283          |          | 0.406        |                       |                              | □                            |
| D-dimer (ng/mL)              |          |                |          |              |                       |                              |                              |
| Week 0                       | 32       | 939.3 ± 101.1  | 29       | 862.5 ± 64.4 |                       |                              |                              |
| Week 8                       | 32       | 1024.8 ± 108.3 | 30       | 887.0 ± 85.1 | -40.5                 | 0.531                        | 0.454                        |
| <i>P</i> -value <sup>d</sup> |          | 0.553          |          | 0.776        |                       |                              | □                            |

<sup>a</sup> Mean ± SE (all such values). PO, Perilla oil; PT, prothrombin time; aPTT, activated partial thromboplastin time. Number of participants used for analysis after outlier removal based on available data.

<sup>b</sup> Linear mixed-effect model adjusted with alcohol intake for 8 weeks was used to compare the changes for 8 weeks between the groups.

<sup>c</sup> Linear mixed-effect model was used to compare the changes for 8 weeks between the groups.

<sup>d</sup> Linear mixed-effect model adjusted with alcohol intake for 8 weeks was used to compare the changes for 8 weeks within each group.

**Table S7. Fasting lipid profiles<sup>a</sup>**

| Variables                    | <i>N</i> | Placebo      | <i>N</i> | PO           | Estimate <sup>b</sup> | <i>P</i> -value <sup>b</sup> | <i>P</i> -value <sup>c</sup> |
|------------------------------|----------|--------------|----------|--------------|-----------------------|------------------------------|------------------------------|
| TC (mg/dL)                   |          |              |          |              |                       |                              |                              |
| Week 0                       | 29       | 211.4 ± 3.9  | 32       | 209.4 ± 5.3  |                       |                              |                              |
| Week 8                       | 33       | 213.0 ± 5.7  | 32       | 209.5 ± 5.0  | 4.5                   | 0.424                        | 0.559                        |
| <i>P</i> -value <sup>d</sup> |          | 0.279        |          | 0.987        |                       |                              | □                            |
| HDL-C (mg/dL)                |          |              |          |              |                       |                              |                              |
| Week 0                       | 33       | 69.1 ± 3.0   | 32       | 65.3 ± 2.8   |                       |                              |                              |
| Week 8                       | 32       | 65.5 ± 2.5   | 32       | 66.0 ± 2.1   | 4.6                   | 0.138                        | 0.229                        |
| <i>P</i> -value <sup>d</sup> |          | 0.076        |          | 0.801        |                       |                              | □                            |
| LDL-C (mg/dL)                |          |              |          |              |                       |                              |                              |
| Week 0                       | 32       | 105.9 ± 4.1  | 32       | 101.5 ± 4.0  |                       |                              |                              |
| Week 8                       | 33       | 104.3 ± 3.9  | 32       | 98.6 ± 3.8   | -1.5                  | 0.745                        | 0.851                        |
| <i>P</i> -value <sup>d</sup> |          | 0.672        |          | 0.359        |                       |                              | □                            |
| VLDL-C (mg/dL)               |          |              |          |              |                       |                              |                              |
| Week 0                       | 30       | 38.4 ± 3.2   | 31       | 40.9 ± 3.0   |                       |                              |                              |
| Week 8                       | 33       | 41.3 ± 3.5   | 32       | 44.9 ± 3.4   | 2.6                   | 0.579                        | 0.705                        |
| <i>P</i> -value <sup>d</sup> |          | 0.867        |          | 0.331        |                       |                              | □                            |
| TG (mg/dL)                   |          |              |          |              |                       |                              |                              |
| Week 0                       | 30       | 108.4 ± 9.9  | 29       | 108.9 ± 7.8  |                       |                              |                              |
| Week 8                       | 31       | 113.3 ± 10.3 | 31       | 121.4 ± 10.2 | 11.5                  | 0.536                        | 0.702                        |
| <i>P</i> -value <sup>d</sup> |          | 0.941        |          | 0.419        |                       |                              | □                            |

<sup>a</sup> Mean ± SE (all such values). PO, Perilla oil; TC, total cholesterol; HDL-C, high density lipoprotein cholesterol; LDL-C, low density lipoprotein cholesterol; VLDL-C, very low density lipoprotein cholesterol; TG, triglyceride. Number of participants used for analysis after outlier removal based on available data.

<sup>b</sup> Linear mixed-effect model adjusted with alcohol intake for 8 weeks was used to compare the changes for 8 weeks between the groups.

<sup>c</sup> Linear mixed-effect model was used to compare the changes for 8 weeks between the groups.

<sup>d</sup> Linear mixed-effect model adjusted with alcohol intake for 8 weeks was used to compare the changes for 8 weeks within each group.

**Table S8. mRNA expression related to inflammation<sup>a</sup>**

| Variables            | N  |           |    | PO        | (unit: fold change)   |                      |                      |
|----------------------|----|-----------|----|-----------|-----------------------|----------------------|----------------------|
|                      |    | Placebo   | N  |           | Estimate <sup>b</sup> | P-value <sup>b</sup> | P-value <sup>c</sup> |
| IL-6                 |    |           |    |           |                       |                      |                      |
| Week 0               | 22 | 1.0 ± 3.9 | 21 | 1.0 ± 0.2 |                       |                      |                      |
| Week 8               | 23 | 1.4 ± 5.7 | 21 | 0.8 ± 0.2 | -0.2                  | 0.444                | 0.220                |
| P-value <sup>d</sup> |    | 0.694     |    | 0.495     |                       |                      | □                    |
| TNF-α                |    |           |    |           |                       |                      |                      |
| Week 0               | 28 | 1.0 ± 0.2 | 27 | 1.0 ± 0.2 |                       |                      |                      |
| Week 8               | 28 | 1.4 ± 0.3 | 25 | 0.7 ± 0.1 | -0.7                  | 0.027                | 0.016                |
| P-value <sup>d</sup> |    | 0.323     |    | 0.034     |                       |                      | □                    |
| TBX21                |    |           |    |           |                       |                      |                      |
| Week 0               | 28 | 1.0 ± 1.0 | 28 | 0.3 ± 4.0 |                       |                      |                      |
| Week 8               | 30 | 1.8 ± 0.4 | 26 | 0.1 ± 3.8 | -1.0                  | 0.022                | 0.016                |
| P-value <sup>d</sup> |    | 0.286     |    | 0.029     |                       |                      | □                    |
| IFN-γ                |    |           |    |           |                       |                      |                      |
| Week 0               | 29 | 1.0 ± 1.0 | 27 | 1.0 ± 0.3 |                       |                      |                      |
| Week 8               | 27 | 1.2 ± 1.0 | 29 | 1.0 ± 0.3 | -0.2                  | 0.295                | 0.145                |
| P-value <sup>d</sup> |    | 0.646     |    | 0.301     |                       |                      | □                    |
| GATA3                |    |           |    |           |                       |                      |                      |
| Week 0               | 30 | 1.0 ± 0.2 | 26 | 1.0 ± 0.2 |                       |                      |                      |
| Week 8               | 27 | 1.0 ± 0.3 | 27 | 1.4 ± 0.2 | 0.5                   | 0.215                | 0.207                |
| P-value <sup>d</sup> |    | 0.899     |    | 0.107     |                       |                      | □                    |
| IL-4                 |    |           |    |           |                       |                      |                      |
| Week 0               | 29 | 1.0 ± 0.2 | 29 | 1.0 ± 0.2 |                       |                      |                      |
| Week 8               | 31 | 2.1 ± 0.4 | 28 | 0.9 ± 0.2 | -1.1                  | 0.087                | 0.141                |
| P-value <sup>d</sup> |    | 0.006     |    | 0.623     |                       |                      | □                    |
| FOXP3                |    |           |    |           |                       |                      |                      |
| Week 0               | 26 | 1.0 ± 0.3 | 25 | 1.0 ± 0.3 |                       |                      |                      |
| Week 8               | 24 | 0.7 ± 0.2 | 25 | 0.6 ± 0.2 | -1.0                  | 0.075                | 0.043                |
| P-value <sup>d</sup> |    | 0.246     |    | 0.187     |                       |                      | □                    |
| IL-10                |    |           |    |           |                       |                      |                      |
| Week 0               | 28 | 1.0 ± 0.2 | 28 | 1.0 ± 0.3 |                       |                      |                      |
| Week 8               | 30 | 1.1 ± 0.3 | 26 | 1.1 ± 0.3 | 0.0                   | 0.361                | 0.407                |
| P-value <sup>d</sup> |    | 0.043     |    | 0.390     |                       |                      | □                    |

<sup>a</sup> Mean ± SE (all such values). PO, Perilla oil; IL, interleukin; TNF, tumor necrosis factor; TBX21, t-box transcription factor 21; IFN, interferon; GATA3, GATA binding protein 3; FOXP3, forkhead box P3. Number of participants used for analysis after outlier removal based on available data.

<sup>b</sup> Linear mixed-effect model adjusted with alcohol intake for 8 weeks was used to compare the changes for 8 weeks between the groups.

<sup>c</sup> Linear mixed-effect model was used to compare the changes for 8 weeks between the groups.

<sup>d</sup> Linear mixed-effect model adjusted with alcohol intake for 8 weeks was used to compare the changes for 8 weeks within each group.



**Table S9. Inflammation and endothelial activation<sup>a</sup>**

| (unit: ng/mL)                |          |                |          |                |                       |                              |                              |
|------------------------------|----------|----------------|----------|----------------|-----------------------|------------------------------|------------------------------|
| Variables                    | <i>N</i> | Placebo        | <i>N</i> | PO             | Estimate <sup>b</sup> | <i>P</i> -value <sup>b</sup> | <i>P</i> -value <sup>c</sup> |
| SAA                          |          |                |          |                |                       |                              |                              |
| Week 0                       | 31       | 2787.6 ± 326.2 | 28       | 4071.2 ± 777.9 |                       |                              |                              |
| Week 8                       | 29       | 2787.9 ± 317.5 | 30       | 3828.1 ± 577.0 | -302.6                | 0.862                        | 0.827                        |
| <i>P</i> -value <sup>d</sup> |          | 0.541          |          | 0.709          |                       |                              | □                            |
| sE-selectin                  |          |                |          |                |                       |                              |                              |
| Week 0                       | 31       | 3.43 ± 0.31    | 30       | 4.22 ± 0.52    |                       |                              |                              |
| Week 8                       | 29       | 3.40 ± 0.29    | 29       | 4.91 ± 0.44    | 0.70                  | 0.237                        | 0.185                        |
| <i>P</i> -value <sup>d</sup> |          | 0.612          |          | 0.026          |                       |                              | □                            |
| sVCAM-1                      |          |                |          |                |                       |                              |                              |
| Week 0                       | 32       | 624.8 ± 17.5   | 32       | 659.8 ± 15.4   |                       |                              |                              |
| Week 8                       | 33       | 618.2 ± 19.6   | 31       | 628.7 ± 14.9   | -19.5                 | 0.254                        | 0.363                        |
| <i>P</i> -value <sup>d</sup> |          | 0.585          |          | 0.030          |                       |                              | □                            |

<sup>a</sup> Mean ± SE (all such values). PO, Perilla oil; SAA, serum amyloid A; sE-selectin, soluble E-selectin; sVCAM-1, soluble vascular cell adhesion molecule-1. Number of participants used for analysis after outlier removal based on available data.

<sup>b</sup> Linear mixed-effect model adjusted with alcohol intake for 8 weeks was used to compare the changes for 8 weeks between the groups.

<sup>c</sup> Linear mixed-effect model was used to compare the changes for 8 weeks between the groups.

<sup>d</sup> Linear mixed-effect model adjusted with alcohol intake for 8 weeks was used to compare the changes for 8 weeks within each group.

**Table S10. Effects of PO on postprandial biomarkers<sup>a</sup>**

| Variables      | N  | Placebo          | N  | PO               | Estimate <sup>b</sup> | P-value <sup>b</sup> | P-value <sup>c</sup> | P-value <sup>d</sup> | P-value <sup>e</sup> |
|----------------|----|------------------|----|------------------|-----------------------|----------------------|----------------------|----------------------|----------------------|
| C-EPI CT (sec) |    |                  |    |                  |                       |                      |                      |                      |                      |
| 0 min          | 30 | 137.7 ± 5.3      | 31 | 151.1 ± 8.5      |                       |                      |                      |                      |                      |
| 120 min        | 32 | 127.5 ± 3.8      | 31 | 129.6 ± 5.1      | -10.7                 | 0.144                |                      | 0.143                |                      |
| 240 min        | 31 | 125.1 ± 4.2      | 32 | 133.6 ± 6.4      | -6.9                  | 0.345                |                      | 0.346                |                      |
| 480 min        | 30 | 118.8 ± 3.5      | 30 | 127.9 ± 6.4      | -4.0                  | 0.587                | 0.512                | 0.580                | 0.511                |
| AUC (sec*min)  |    |                  |    |                  | Estimate <sup>f</sup> | P-value <sup>f</sup> | P-value <sup>g</sup> |                      |                      |
| 0-480 min      | 30 | 61250.0 ± 1805.9 | 31 | 64383.9 ± 2817.0 | 3518.7                | 0.308                | 0.356                |                      |                      |
| C-ADP CT (sec) |    |                  |    |                  |                       |                      |                      |                      |                      |
| 0 min          | 32 | 96.1 ± 3.2       | 32 | 106.2 ± 3.9      |                       |                      |                      |                      |                      |
| 120 min        | 30 | 94.9 ± 2.6       | 32 | 97.4 ± 3.5       | -8.1                  | 0.057                |                      | 0.056                |                      |
| 240 min        | 31 | 93.7 ± 2.8       | 31 | 96.5 ± 3.7       | -7.1                  | 0.097                |                      | 0.097                |                      |
| 480 min        | 31 | 89.5 ± 3.3       | 31 | 94.1 ± 2.9       | -4.0                  | 0.352                | 0.220                | 0.353                | 0.218                |
| AUC (sec*min)  |    |                  |    |                  | Estimate <sup>f</sup> | P-value <sup>f</sup> | P-value <sup>g</sup> |                      |                      |
| 0-480 min      | 30 | 45160.0 ± 1198.0 | 30 | 46484.0 ± 1516.2 | 1611.4                | 0.409                | 0.496                |                      |                      |
| PT (sec)       |    |                  |    |                  |                       |                      |                      |                      |                      |
| 0 min          | 32 | 11.18 ± 0.08     | 32 | 11.18 ± 0.08     |                       |                      |                      |                      |                      |
| 120 min        | 32 | 11.32 ± 0.08     | 32 | 11.35 ± 0.08     | 0.03                  | 0.702                |                      | 0.702                |                      |
| 240 min        | 32 | 11.02 ± 0.09     | 31 | 11.14 ± 0.08     | 0.08                  | 0.256                |                      | 0.256                |                      |
| 480 min        | 32 | 10.87 ± 0.08     | 32 | 10.95 ± 0.07     | 0.07                  | 0.329                | 0.642                | 0.329                | 0.642                |
| AUC (sec*min)  |    |                  |    |                  | Estimate <sup>f</sup> | P-value <sup>f</sup> | P-value <sup>g</sup> |                      |                      |
| 0-480 min      | 32 | 5315.8 ± 38.4    | 31 | 5361.1 ± 32.6    | 48.1                  | 0.350                | 0.374                |                      |                      |

**Table S10. Effects of PO on postprandial biomarkers (continued)<sup>a</sup>**

| Variables             | N  | Placebo            | N  | PO                 | Estimate <sup>b</sup> | P-value <sup>b</sup> | P-value <sup>c</sup> | P-value <sup>d</sup> | P-value <sup>e</sup> |
|-----------------------|----|--------------------|----|--------------------|-----------------------|----------------------|----------------------|----------------------|----------------------|
| aPTT (sec) aPTT (sec) |    |                    |    |                    |                       |                      |                      |                      |                      |
| 0 min                 | 33 | 27.42 ± 0.34       | 32 | 27.42 ± 0.28       |                       |                      |                      |                      |                      |
| 120 min               | 33 | 27.55 ± 0.35       | 32 | 27.56 ± 0.26       | 0.01                  | 0.957                |                      | 0.957                |                      |
| 240 min               | 31 | 27.32 ± 0.28       | 32 | 27.49 ± 0.28       | 0.18                  | 0.333                |                      | 0.333                |                      |
| 480 min               | 33 | 27.74 ± 0.33       | 32 | 27.82 ± 0.26       | 0.07                  | 0.697                | 0.757                | 0.697                | 0.756                |
| AUC (sec*min)         |    |                    |    |                    | Estimate <sup>f</sup> | P-value <sup>f</sup> | P-value <sup>g</sup> |                      |                      |
| 0-480 min             | 31 | 13201.0 ± 132.0    | 32 | 13237.7 ± 125.5    | 22.3                  | 0.904                | 0.841                |                      |                      |
| Fibrinogen (mg/dL)    |    |                    |    |                    |                       |                      |                      |                      |                      |
| 0 min                 | 31 | 220.7 ± 8.2        | 32 | 231.0 ± 6.9        |                       |                      |                      |                      |                      |
| 120 min               | 32 | 209.8 ± 8.5        | 32 | 216.9 ± 8.5        | 1.8                   | 0.923                |                      | 0.924                |                      |
| 240 min               | 32 | 223.6 ± 9.7        | 31 | 224.3 ± 7.9        | -2.4                  | 0.739                |                      | 0.738                |                      |
| 480 min               | 33 | 229.2 ± 9.7        | 31 | 226.4 ± 6.4        | -2.2                  | 0.956                | 0.976                | 0.953                | 0.976                |
| AUC (mg/dL*min)       |    |                    |    |                    | Estimate <sup>f</sup> | P-value <sup>f</sup> | P-value <sup>g</sup> |                      |                      |
| 0-480 min             | 32 | 106452.9 ± 4148.8  | 32 | 110261.3 ± 4241.1  | 3759.3                | 0.515                | 0.506                |                      |                      |
| D-dimer (ng/mL)       |    |                    |    |                    |                       |                      |                      |                      |                      |
| 0 min                 | 32 | 1024.8 ± 108.3     | 30 | 887.0 ± 85.1       |                       |                      |                      |                      |                      |
| 120 min               | 33 | 1039.3 ± 128.7     | 28 | 917.8 ± 96.6       | -4.8                  | 0.838                |                      | 0.838                |                      |
| 240 min               | 33 | 1114.5 ± 131.8     | 29 | 814.0 ± 60.8       | -115.6                | 0.245                |                      | 0.245                |                      |
| 480 min               | 31 | 1080.3 ± 106.0     | 29 | 920.2 ± 66.1       | -110.3                | 0.201                | 0.314                | 0.202                | 0.314                |
| AUC (ng/mL*min)       |    |                    |    |                    | Estimate <sup>f</sup> | P-value <sup>f</sup> | P-value <sup>g</sup> |                      |                      |
| 0-480 min             | 31 | 481462.1 ± 45516.1 | 29 | 419360.4 ± 34406.7 | -60133.0              | 0.438                | 0.408                |                      |                      |

**Table S10. Effects of PO on postprandial biomarkers (continued)<sup>a</sup>**

| Variables           | <i>N</i> | Placebo              | <i>N</i> | PO                   | Estimate <sup>b</sup> | <i>P</i> -value <sup>b</sup> | <i>P</i> -value <sup>c</sup> | <i>P</i> -value <sup>d</sup> | <i>P</i> -value <sup>e</sup> |
|---------------------|----------|----------------------|----------|----------------------|-----------------------|------------------------------|------------------------------|------------------------------|------------------------------|
| TG (mg/dL)          |          |                      |          |                      |                       |                              |                              |                              |                              |
| 0 min               | 31       | 113.3 ± 10.3         | 31       | 121.4 ± 10.2         |                       |                              |                              |                              |                              |
| 120 min             | 33       | 143.8 ± 15.0         | 32       | 157.5 ± 13.0         | 8.1                   | 0.315                        |                              | 0.314                        |                              |
| 240 min             | 33       | 218.2 ± 21.6         | 30       | 194.3 ± 14.5         | -24.9                 | 0.521                        |                              | 0.521                        |                              |
| 480 min             | 31       | 133.2 ± 12.0         | 28       | 129.9 ± 10.2         | 0.3                   | 0.943                        | 0.412                        | 0.941                        | 0.411                        |
| AUC (mg/dL *min)    |          |                      |          |                      | Estimate <sup>f</sup> | <i>P</i> -value <sup>f</sup> | <i>P</i> -value <sup>g</sup> |                              |                              |
| 0-480 min           | 33       | 81707.3 ± 7388.9     | 29       | 75343.5 ± 5457.7     | -6991.8               | 0.636                        | 0.636                        |                              |                              |
| SAA (ng/mL)         |          |                      |          |                      |                       |                              |                              |                              |                              |
| 0 min               | 29       | 2787.9 ± 317.5       | 30       | 3828.1 ± 577.0       |                       |                              |                              |                              |                              |
| 120 min             | 29       | 2625.5 ± 296.2       | 30       | 3799.2 ± 549.2       | 133.6                 | 0.442                        |                              | 0.442                        |                              |
| 240 min             | 30       | 2827.6 ± 371.3       | 30       | 3819.1 ± 564.3       | 129.2                 | 0.333                        |                              | 0.334                        |                              |
| 480 min             | 29       | 2581.1 ± 320.8       | 30       | 3749.2 ± 578.1       | 204.0                 | 0.365                        | 0.751                        | 0.366                        | 0.751                        |
| AUC (ng/mL *min)    |          |                      |          |                      | Estimate <sup>f</sup> | <i>P</i> -value <sup>f</sup> | <i>P</i> -value <sup>g</sup> |                              |                              |
| 0-480 min           | 29       | 1290043.8 ± 158743.7 | 30       | 1822926.9 ± 268927.9 | 533011.0              | 0.342                        | 0.338                        |                              |                              |
| sE-selectin (ng/mL) |          |                      |          |                      |                       |                              |                              |                              |                              |
| 0 min               | 29       | 3.40 ± 0.29          | 29       | 4.91 ± 0.44          |                       |                              |                              |                              |                              |
| 120 min             | 32       | 4.16 ± 0.39          | 29       | 5.21 ± 0.45          | -0.3                  | 0.549                        |                              | 0.547                        |                              |
| 240 min             | 31       | 3.87 ± 0.33          | 29       | 5.19 ± 0.52          | 0.0                   | 0.989                        |                              | 0.985                        |                              |
| 480 min             | 31       | 4.30 ± 0.40          | 28       | 4.57 ± 0.41          | -0.8                  | 0.089                        | 0.272                        | 0.088                        | 0.270                        |
| AUC (ng/mL *min)    |          |                      |          |                      | Estimate <sup>f</sup> | <i>P</i> -value <sup>f</sup> | <i>P</i> -value <sup>g</sup> |                              |                              |
| 0-480 min           | 30       | 2071.3 ± 176.6       | 29       | 2445.3 ± 218.9       | 334.1                 | 0.262                        | 0.205                        |                              |                              |

**Table S10. Effects of PO on postprandial biomarkers (continued)<sup>a</sup>**

| Variables        | <i>N</i> | Placebo           | <i>N</i> | PO                | Estimate <sup>b</sup> | <i>P</i> -value <sup>b</sup> | <i>P</i> -value <sup>c</sup> | <i>P</i> -value <sup>d</sup> | <i>P</i> -value <sup>e</sup> |
|------------------|----------|-------------------|----------|-------------------|-----------------------|------------------------------|------------------------------|------------------------------|------------------------------|
| sVCAM-1 (ng/mL)  |          |                   |          |                   |                       |                              |                              |                              |                              |
| 0 min            | 33       | 618.20 ± 19.60    | 31       | 628.70 ± 628.70   |                       |                              |                              |                              |                              |
| 120 min          | 33       | 608.60 ± 20.30    | 32       | 611.10 ± 611.10   | -13.7                 | 0.309                        |                              | 0.310                        |                              |
| 240 min          | 33       | 617.20 ± 20.80    | 31       | 615.40 ± 615.40   | -12.3                 | 0.362                        |                              | 0.362                        |                              |
| 480 min          | 30       | 614.10 ± 16.30    | 31       | 623.20 ± 623.20   | -9.5                  | 0.491                        | 0.738                        | 0.491                        | 0.739                        |
| AUC (ng/mL *min) |          |                   |          |                   | Estimate <sup>f</sup> | <i>P</i> -value <sup>f</sup> | <i>P</i> -value <sup>g</sup> |                              |                              |
| 0-480 min        | 31       | 288026.5 ± 8124.0 | 31       | 295819.1 ± 7236.9 | 7356.2                | 0.504                        | 0.477                        |                              |                              |

<sup>a</sup> Mean ± SE (all such values); PO, Perilla oil; C-EPI CT, collagen-epinephrine closure time; C-ADP CT, collagen-adenosine diphosphate closure time; PT, prothrombin time; aPTT, activated partial thromboplastin time; TG, triglyceride; SAA, serum amyloid A; sE-selectin, soluble E-selectin; sVCAM-1, soluble-vascular cell adhesion molecule-1; AUC, area under the curve. Number of participants used for analysis after outlier removal based on available data.

<sup>b</sup> Linear mixed-effect model adjusted with alcohol intake at week 8 was used to compare the differences between groups

<sup>c</sup> Linear mixed-effect model adjusted with alcohol intake at week 8 was used to analyze the effects of group\*time.

<sup>d</sup> Linear mixed-effect model was used to compare the differences between groups

<sup>e</sup> Linear mixed-effect was used to analyze the effects of group\*time.

<sup>f</sup> Linear mixed-effect model adjusted with alcohol intake at week 8 was used to analyze the effects of group.

<sup>g</sup> Linear mixed-effect model was used to analyze the effects of group.

**Table S11. Vital signs<sup>a</sup>**

| <b>Variables</b>             | <b>Placebo (N=33)</b> | <b>PO (N=32)</b> | <b>P-value<sup>b</sup></b> |
|------------------------------|-----------------------|------------------|----------------------------|
| Pulse rate (beats/min)       |                       |                  |                            |
| Week 0                       | 81.8 ± 1.9            | 80.4 ± 2.1       |                            |
| Week 4                       | 79.0 ± 1.9            | 80.4 ± 1.9       |                            |
| Week 8                       | 81.2 ± 2.2            | 83.0 ± 2.2       | 0.480                      |
| <i>P</i> -value <sup>c</sup> | 0.776                 | 0.198            |                            |
| SBP (mmHg)                   |                       |                  |                            |
| Week 0                       | 130.5 ± 1.8           | 134.2 ± 2.1      |                            |
| Week 4                       | 128.8 ± 2.4           | 133.8 ± 1.6      |                            |
| Week 8                       | 124.8 ± 2.3           | 129.7 ± 2.3      | 0.900                      |
| <i>P</i> -value <sup>c</sup> | 0.008                 | 0.037            |                            |
| DBP (mmHg)                   |                       |                  |                            |
| Week 0                       | 78.8 ± 1.6            | 78.6 ± 1.6       |                            |
| Week 4                       | 78.1 ± 2.0            | 82.3 ± 1.6       |                            |
| Week 8                       | 73.9 ± 1.4            | 79.3 ± 2.0       | 0.075                      |
| <i>P</i> -value <sup>c</sup> | 0.007                 | 0.695            |                            |
| Body temperature (°C)        |                       |                  |                            |
| Week 0                       | 35.9 ± 0.1            | 36.0 ± 0.1       |                            |
| Week 4                       | 36.3 ± 0.1            | 36.3 ± 0.1       |                            |
| Week 8                       | 36.1 ± 0.1            | 36.1 ± 0.1       | 0.163                      |
| <i>P</i> -value <sup>c</sup> | 0.003                 | 0.513            |                            |

<sup>a</sup> Mean ± SE (all such values). PO, Perilla oil; SBP, systolic blood pressure; DBP, diastolic blood pressure.

<sup>b</sup> Linear mixed-effect model was used to analyze the effects of group\*time.

<sup>c</sup> Linear mixed-effect model was used to analyze the difference within each group.

**Table S12. Hematological test<sup>a</sup>**

| <b>Variables</b>          | <b>Placebo (N=33)</b> | <b>PO (N=32)</b> | <b>P-value<sup>b</sup></b> |
|---------------------------|-----------------------|------------------|----------------------------|
| WBC (10 <sup>3</sup> /μL) |                       |                  |                            |
| Week 0                    | 5.8 ± 0.3             | 5.8 ± 0.3        |                            |
| Week 8                    | 6.2 ± 0.3             | 6.1 ± 0.3        | 0.671                      |
| P-value <sup>c</sup>      | 0.068                 | 0.222            |                            |
| RBC (10 <sup>6</sup> /μL) |                       |                  |                            |
| Week 0                    | 4.9 ± 0.1             | 4.9 ± 0.1        |                            |
| Week 8                    | 4.8 ± 0.1             | 4.9 ± 0.1        | 0.460                      |
| P-value <sup>c</sup>      | 0.596                 | 0.606            |                            |
| Hb (g/dL)                 |                       |                  |                            |
| Week 0                    | 14.5 ± 0.2            | 15.1 ± 0.2       |                            |
| Week 8                    | 14.3 ± 0.2            | 15.0 ± 0.2       | 0.527                      |
| P-value <sup>c</sup>      | 0.122                 | 0.517            |                            |
| Hct (%)                   |                       |                  |                            |
| Week 0                    | 43.1 ± 0.7            | 44.0 ± 0.6       |                            |
| Week 8                    | 42.6 ± 0.7            | 43.8 ± 0.6       | 0.600                      |
| P-value <sup>c</sup>      | 0.170                 | 0.532            |                            |
| PLT (10 <sup>3</sup> /μL) |                       |                  |                            |
| Week 0                    | 280.2 ± 11.3          | 275.4 ± 10.6     |                            |
| Week 8                    | 278.5 ± 11.3          | 276.5 ± 11.4     | 0.768                      |
| P-value <sup>c</sup>      | 0.694                 | 0.979            |                            |
| MCV (fL)                  |                       |                  |                            |
| Week 0                    | 88.8 ± 0.7            | 90.1 ± 0.7       |                            |
| Week 8                    | 88.1 ± 0.6            | 89.3 ± 0.7       | 0.589                      |
| P-value <sup>c</sup>      | 0.006                 | 0.001            |                            |
| MCH (pg)                  |                       |                  |                            |
| Week 0                    | 29.9 ± 0.3            | 30.9 ± 0.3       |                            |
| Week 8                    | 29.6 ± 0.3            | 30.6 ± 0.3       | 0.751                      |
| P-value <sup>c</sup>      | 0.027                 | 0.009            |                            |
| MCHC (g/dL)               |                       |                  |                            |
| Week 0                    | 33.6 ± 0.2            | 34.2 ± 0.2       |                            |
| Week 8                    | 33.6 ± 0.2            | 34.2 ± 0.2       | 0.965                      |
| P-value <sup>c</sup>      | 0.862                 | 0.912            |                            |

**Table S12. Hematological test<sup>a</sup> (continued)**

| <b>Variables</b>     | <b>Placebo (N=33)</b> | <b>PO (N=32)</b> | <b>P-value<sup>b</sup></b> |
|----------------------|-----------------------|------------------|----------------------------|
| Neutrophils (%)      |                       |                  |                            |
| Week 0               | 56.5 ± 1.6            | 52.9 ± 1.7       |                            |
| Week 8               | 55.7 ± 1.6            | 54.1 ± 1.5       | 0.283                      |
| P-value <sup>c</sup> | 0.609                 | 0.314            |                            |
| Lymphocytes (%)      |                       |                  |                            |
| Week 0               | 32.2 ± 1.4            | 35.0 ± 1.5       |                            |
| Week 8               | 32.9 ± 1.5            | 34.4 ± 1.4       | 0.517                      |
| P-value <sup>c</sup> | 0.640                 | 0.654            |                            |
| Monocytes (%)        |                       |                  |                            |
| Week 0               | 7.2 ± 0.3             | 7.6 ± 0.3        |                            |
| Week 8               | 7.3 ± 0.4             | 7.5 ± 0.3        | 0.628                      |
| P-value <sup>c</sup> | 0.924                 | 0.558            |                            |
| Eosinophils (%)      |                       |                  |                            |
| Week 0               | 3.4 ± 0.4             | 3.8 ± 0.5        |                            |
| Week 8               | 3.4 ± 0.5             | 3.3 ± 0.4        | 0.543                      |
| P-value <sup>c</sup> | 0.858                 | 0.499            |                            |
| Basophils (%)        |                       |                  |                            |
| Week 0               | 0.8 ± 0.1             | 0.7 ± 0.1        |                            |
| Week 8               | 0.8 ± 0.1             | 0.7 ± 0.1        | 0.846                      |
| P-value <sup>c</sup> | 0.722                 | 0.937            |                            |

<sup>a</sup> Mean ± SE (all such values). PO; Perilla oil; WBC, white blood cell; RBC, red blood cell; Hb, hemoglobin; Hct, hematocrit; PLT, platelet count; MCV, mean corpuscular volume; MCH, mean corpuscular hemoglobin; MCHC, mean corpuscular hemoglobin concentration.

<sup>b</sup> Linear mixed-effect model was used to analyze the effects of group, time, and group\*time.

<sup>c</sup> Linear mixed-effect model was used to analyze the difference within each group.

**Table S13. Blood chemistry test<sup>a</sup>**

| <b>Variables</b>        | <b>Placebo (N=33)</b> | <b>PO (N=32)</b> | <b>P-value<sup>b</sup></b> |
|-------------------------|-----------------------|------------------|----------------------------|
| ALT (IU/L)              |                       |                  |                            |
| Week 0                  | 23.6 ± 2.5            | 24.0 ± 2.9       |                            |
| Week 8                  | 24.5 ± 2.5            | 25.3 ± 2.7       | 0.782                      |
| P-value <sup>c</sup>    | 0.681                 | 0.428            |                            |
| AST (IU/L)              |                       |                  |                            |
| Week 0                  | 19.7 ± 0.8            | 21.2 ± 1.3       |                            |
| Week 8                  | 22.4 ± 1.1            | 22.6 ± 1.3       | 0.507                      |
| P-value <sup>c</sup>    | 0.022                 | 0.173            |                            |
| ALP (U/L)               |                       |                  |                            |
| Week 0                  | 72.5 ± 3.2            | 75.3 ± 3.7       |                            |
| Week 8                  | 72.2 ± 3.2            | 74.3 ± 3.3       | 0.899                      |
| P-value <sup>c</sup>    | 0.795                 | 0.665            |                            |
| BUN (mg/dL)             |                       |                  |                            |
| Week 0                  | 12.3 ± 0.5            | 13.8 ± 0.7       |                            |
| Week 8                  | 13.5 ± 0.5            | 14.5 ± 0.6       | 0.425                      |
| P-value <sup>c</sup>    | 0.003                 | 0.056            |                            |
| Creatinine (mg/dL)      |                       |                  |                            |
| Week 0                  | 0.9 ± 0.0             | 0.9 ± 0.0        |                            |
| Week 8                  | 0.9 ± 0.0             | 0.9 ± 0.0        | 0.565                      |
| P-value <sup>c</sup>    | 0.834                 | 0.312            |                            |
| Total bilirubin (mg/dL) |                       |                  |                            |
| Week 0                  | 0.7 ± 0.1             | 0.7 ± 0.1        |                            |
| Week 8                  | 0.6 ± 0.0             | 0.7 ± 0.1        | 0.342                      |
| P-value <sup>c</sup>    | 0.211                 | 0.920            |                            |
| Uric acid (mg/dL)       |                       |                  |                            |
| Week 0                  | 5.7 ± 0.2             | 6.0 ± 0.2        |                            |
| Week 8                  | 5.9 ± 0.3             | 6.1 ± 0.2        | 0.501                      |
| P-value <sup>c</sup>    | 0.092                 | 0.466            |                            |
| Total protein (g/dL)    |                       |                  |                            |
| Week 0                  | 7.5 ± 0.1             | 7.4 ± 0.1        |                            |
| Week 8                  | 7.4 ± 0.1             | 7.3 ± 0.1        | 0.276                      |
| P-value <sup>c</sup>    | 0.031                 | 0.528            |                            |
| Albumin (g/dL)          |                       |                  |                            |
| Week 0                  | 4.6 ± 0.0             | 4.5 ± 0.0        |                            |
| Week 8                  | 4.6 ± 0.1             | 4.6 ± 0.0        | 0.358                      |
| P-value <sup>c</sup>    | 0.650                 | 0.399            |                            |
| Glucose (mg/dL)         |                       |                  |                            |
| Week 0                  | 96.7 ± 1.6            | 97.8 ± 1.5       |                            |
| Week 8                  | 95.3 ± 1.2            | 96.8 ± 1.5       | 0.791                      |
| P-value <sup>c</sup>    | 0.251                 | 0.446            |                            |

**Table S13. Blood chemistry test<sup>a</sup> (continued)**

| <b>Variables</b>                  | <b>Placebo (N=33)</b> | <b>PO (N=32)</b> | <b>P-value<sup>b</sup></b> |
|-----------------------------------|-----------------------|------------------|----------------------------|
| eGFR (mL/min/1.73m <sup>2</sup> ) |                       |                  |                            |
| Week 0                            | 102.1 ± 2.4           | 100.0 ± 2.5      |                            |
| Week 8                            | 102.1 ± 2.2           | 99.1 ± 2.1       | 0.738                      |
| P-value <sup>c</sup>              | 0.968                 | 0.611            |                            |

<sup>a</sup> Mean ± SE (all such values). PO; Perilla oil, ALT, alanine aminotransferase; AST, aspartate aminotransferase; ALP, alkaline phosphatase; BUN, blood urea nitrogen; eGFR, estimated glomerular filtration rate.

<sup>b</sup> Linear mixed-effect model was used to analyze the effects of group, time, and group\*time.

<sup>c</sup> Linear mixed-effect model was used to analyze the difference within each group.

**Table S14. Urine test<sup>a</sup>**

| Variables                    | Placebo |    | PO  |    | <i>P</i> -value <sup>b</sup> |
|------------------------------|---------|----|-----|----|------------------------------|
|                              | NCS     | CS | NCS | CS |                              |
| pH                           |         |    |     |    |                              |
| Week 0                       | 33      | 0  | 32  | 0  | -                            |
| Week 8                       | 33      | 0  | 32  | 0  | -                            |
| <i>P</i> -value <sup>c</sup> |         | -  |     | -  |                              |
| Protein                      |         |    |     |    |                              |
| Week 0                       | 33      | 0  | 32  | 0  | -                            |
| Week 8                       | 33      | 0  | 32  | 0  | -                            |
| <i>P</i> -value <sup>c</sup> |         | -  |     | -  |                              |
| Glucose                      |         |    |     |    |                              |
| Week 0                       | 33      | 0  | 32  | 0  | -                            |
| Week 8                       | 33      | 0  | 32  | 0  | -                            |
| <i>P</i> -value <sup>c</sup> |         | -  |     | -  |                              |
| Ketone                       |         |    |     |    |                              |
| Week 0                       | 33      | 0  | 32  | 0  | -                            |
| Week 8                       | 33      | 0  | 32  | 0  | -                            |
| <i>P</i> -value <sup>c</sup> |         | -  |     | -  |                              |
| Blood                        |         |    |     |    |                              |
| Week 0                       | 33      | 0  | 32  | 0  | -                            |
| Week 8                       | 33      | 0  | 32  | 0  | -                            |
| <i>P</i> -value <sup>c</sup> |         | -  |     | -  |                              |
| Urobilinogen                 |         |    |     |    |                              |
| Week 0                       | 33      | 0  | 32  | 0  | -                            |
| Week 8                       | 33      | 0  | 32  | 0  | -                            |
| <i>P</i> -value <sup>c</sup> |         | -  |     | -  |                              |
| Bilirubin                    |         |    |     |    |                              |
| Week 0                       | 33      | 0  | 32  | 0  | -                            |
| Week 8                       | 33      | 0  | 32  | 0  | -                            |
| <i>P</i> -value <sup>c</sup> |         | -  |     | -  |                              |
| Nitrate                      |         |    |     |    |                              |
| Week 0                       | 33      | 0  | 32  | 0  | -                            |
| Week 8                       | 33      | 0  | 32  | 0  | -                            |
| <i>P</i> -value <sup>c</sup> |         | -  |     | -  |                              |

**Table S14. Urine test<sup>a</sup> (continued)**

| Variables                    | Placebo |    | PO  |    | <i>P</i> -value <sup>b</sup> |
|------------------------------|---------|----|-----|----|------------------------------|
|                              | NCS     | CS | NCS | CS |                              |
| Leukocyte                    |         |    |     |    |                              |
| Week 0                       | 33      | 0  | 32  | 0  | -                            |
| Week 8                       | 33      | 0  | 32  | 0  | -                            |
| <i>P</i> -value <sup>c</sup> |         | -  |     | -  |                              |
| Specific gravity             |         |    |     |    |                              |
| Week 0                       | 33      | 0  | 32  | 0  | -                            |
| Week 8                       | 33      | 0  | 32  | 0  | -                            |
| <i>P</i> -value <sup>c</sup> |         | -  |     | -  |                              |

<sup>a</sup> Number of subjects. PO, Perilla oil; NCS, not clinically significant; CS, clinically significant.

<sup>b</sup> Fisher's exact test was used to compare the difference between the groups and p-values were not computed because CS column contains all zeros.

<sup>c</sup> McNemar's test was used to compare the difference within each group and p-values were not computed because CS column contains all zeros.

**Table S15. Normal range for hematological test, blood chemistry test and urine test<sup>a</sup>**

| <b>Variables</b>                  | <b>Normal range</b>         |
|-----------------------------------|-----------------------------|
| <b>Hematological test</b>         |                             |
| WBC ( $10^3/\mu\text{L}$ )        | 3.7 - 9.8                   |
| RBC ( $10^6/\mu\text{L}$ )        | M: 4.2-5.8 / F: 3.7-5.2     |
| Hb (g/dL)                         | M: 13.0-17.0 / F: 11.0-16.0 |
| Hct (%)                           | M: 40-51 / F: 33-48         |
| PLT ( $10^3/\mu\text{L}$ )        | 150 - 380                   |
| MCV (fL)                          | 85 - 100                    |
| MCH (pg)                          | 26 - 34                     |
| MCHC (g/dL)                       | 31 - 34                     |
| Neutrophils (%)                   | 40 - 75                     |
| Lymphocytes (%)                   | 21 - 50                     |
| Monocytes (%)                     | 4 - 10                      |
| Eosinophils (%)                   | 0 - 7                       |
| Basophils (%)                     | 0 - 2                       |
| <b>Blood chemistry test</b>       |                             |
| ALT (IU/L)                        | 0 - 41                      |
| AST (IU/L)                        | 0 - 40                      |
| ALP (IU/L)                        | 35 - 129                    |
| BUN (mg/dL)                       | 5 - 20                      |
| Creatine (mg/dL)                  | M: 0.7-1.2 / W: 0.5-0.9     |
| Total bilirubin (mg/dL)           | 0 - 1.2                     |
| Uric acid (mg/dL)                 | M: 3.6-8.6 / W: 2.4-6.1     |
| Total protein (g/dL)              | 6.5 - 8.0                   |
| Albumin (g/dL)                    | 3.5 - 5.2                   |
| Glucose (mg/dL)                   | 74 - 109                    |
| eGFR (mL/min/1.73m <sup>2</sup> ) | $\geq 60$                   |
| <b>Urine test</b>                 |                             |
| pH                                | 5.5 - 7.5                   |
| Protein                           | Negative                    |
| Glucose                           | Negative                    |
| Ketone                            | Negative                    |
| Blood                             | Negative                    |
| Urobilinogen (mg/dL)              | 0 - 1.0                     |
| Bilirubin                         | Negative                    |
| Nitrate                           | Negative                    |
| Leukocyte                         | Negative                    |
| Specific gravity                  | 1.010 - 1.025               |

<sup>a</sup> Normal ranges are from CHA Bundang Medical Center. WBC, white blood cell; RBC, red blood cell; Hb, hemoglobin; Hct, hematocrit; PLT, platelet; MCV, mean corpuscular volume; MCH, mean corpuscular hemoglobin; MCHC, mean corpuscular hemoglobin concentration; ALT, alanine aminotransferase; AST, aspartate aminotransferase; ALP, alkaline phosphatase; BUN, blood urea nitrogen; eGFR, estimated glomerular filtration rate.

**Table S16. Electrocardiogram<sup>a</sup>**

|                      |                       |                  | (unit: msec)               |
|----------------------|-----------------------|------------------|----------------------------|
|                      | <b>Placebo (N=33)</b> | <b>PO (N=32)</b> | <b>P-value<sup>b</sup></b> |
| Week 0               | 65.9 ± 1.6            | 64.6 ± 1.6       |                            |
| Week 8               | 64.4 ± 1.4            | 63.5 ± 1.6       | 0.889                      |
| P-value <sup>c</sup> | 0.347                 | 0.464            |                            |

<sup>a</sup> Mean ± SE (all such values). msec, millisecond; PO, Perilla oil.

<sup>b</sup> Linear mixed-effect model was used to analyze the effects of group\*time.

<sup>c</sup> Linear mixed-effect model was used to analyze the difference within each group.

**Table S17. Adverse event<sup>a</sup>**

| <b>Category</b>                        | <b>Placebo</b> | <b>PO</b> | <b><i>P</i>-value<sup>b</sup></b> |
|----------------------------------------|----------------|-----------|-----------------------------------|
| Occurrence                             |                |           |                                   |
| Adverse event                          | 4 / 5          | 5 / 5     | 0.733                             |
| Severe adverse event                   | 0 / 0          | 0 / 0     | -                                 |
| Type                                   |                |           |                                   |
| Diarrhea                               | 1 / 1          | 0 / 0     | 1.000                             |
| Constipation                           | 1 / 1          | 1 / 1     | 1.000                             |
| Nausea                                 | 1 / 1          | 0 / 0     | 1.000                             |
| Dyspepsia                              | 0 / 0          | 1 / 1     | 0.492                             |
| Common cold                            | 1 / 1          | 0 / 0     | 1.000                             |
| Alanine aminotransferase increased     | 0 / 0          | 1 / 1     | 0.492                             |
| Urticaria                              | 1 / 1          | 0 / 0     | 1.000                             |
| Chest pain                             | 0 / 0          | 1 / 1     | 0.492                             |
| Left tinnitus                          | 0 / 0          | 1 / 1     | 0.492                             |
| Severity                               |                |           |                                   |
| Mild                                   | 4 / 5          | 5 / 5     | 0.733                             |
| Moderate                               | 0 / 0          | 0 / 0     | -                                 |
| Severe                                 | 0 / 0          | 0 / 0     | -                                 |
| Related to the investigational product |                |           |                                   |
| Definitely related                     | 0 / 0          | 0 / 0     | -                                 |
| Probably related                       | 0 / 0          | 0 / 0     | -                                 |
| Possibly related                       | 2 / 3          | 2 / 2     | 1.000                             |
| Probably not related                   | 2 / 2          | 3 / 3     | 0.672                             |
| Definitely not related                 | 0 / 0          | 0 / 0     | -                                 |
| Unknown                                | 0 / 0          | 0 / 0     | -                                 |

<sup>a</sup> Number of subjects / number of cases. PO, Perilla oil.

<sup>b</sup> Fisher's exact test was used to compare the difference between the groups.
